# Supplementary material for: HIF1α is not a target of 14q deletion in clear cell renal cancer
Source: PubMed Central journal article supplement (PMC7573601; doi:10.1038/s41598-020-74631-7), 2020-10-19
Supplement: 41598_2020_74631_MOESM2_ESM.pdf [file 41598_2020_74631_MOESM2_ESM.pdf]

# **HIF1 $\alpha$ is not a target of 14q deletion in clear cell renal cancer**

Niraj Shenoy, MD, PhD, MS <sup>1,2</sup>

- 1 Department of Medicine (Oncology), Albert Einstein College of Medicine, Montefiore Medical Center, New York 10461
- 2 Experimental Therapeutics Program, Albert Einstein Cancer Center, Albert Einstein College of Medicine, New York 10461

10.24.19

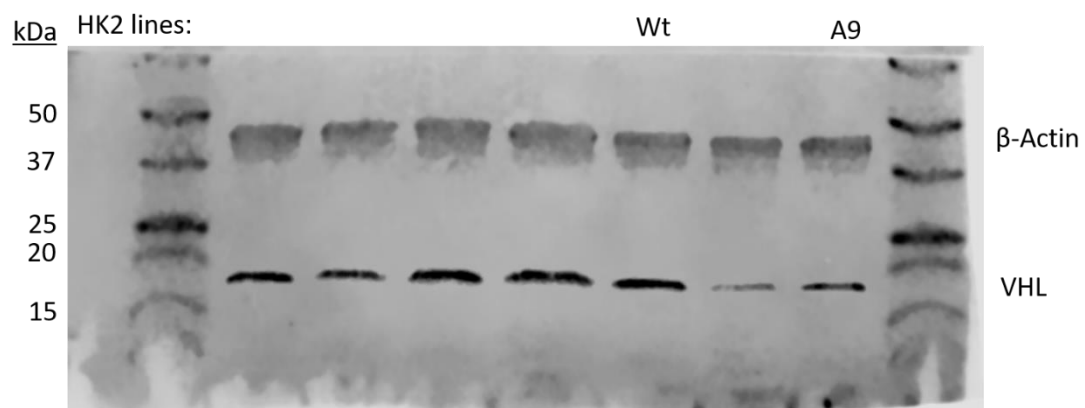

11.13.19

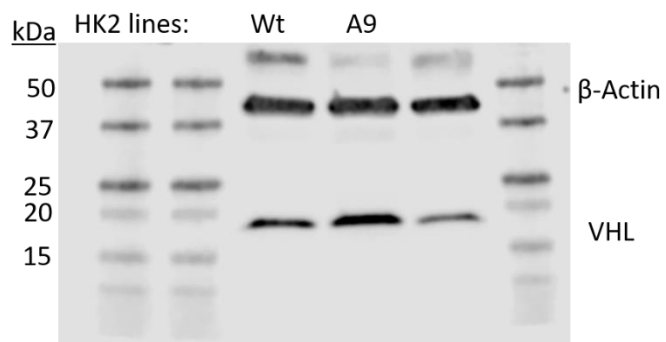

Full-length blots for figures S4C, S4D
